# Supplementary material for: Pre-vaccine serotype composition within a lineage signposts its serotype replacement – a carriage study over 7 years following pneumococcal conjugate vaccine use in the UK
Source: PubMed Central journal article supplement (PMC5628697; doi:10.1099/mgen.0.000119), 2017-06-09

Supplementary Figure 1. BAPS cluster prevalence over study period

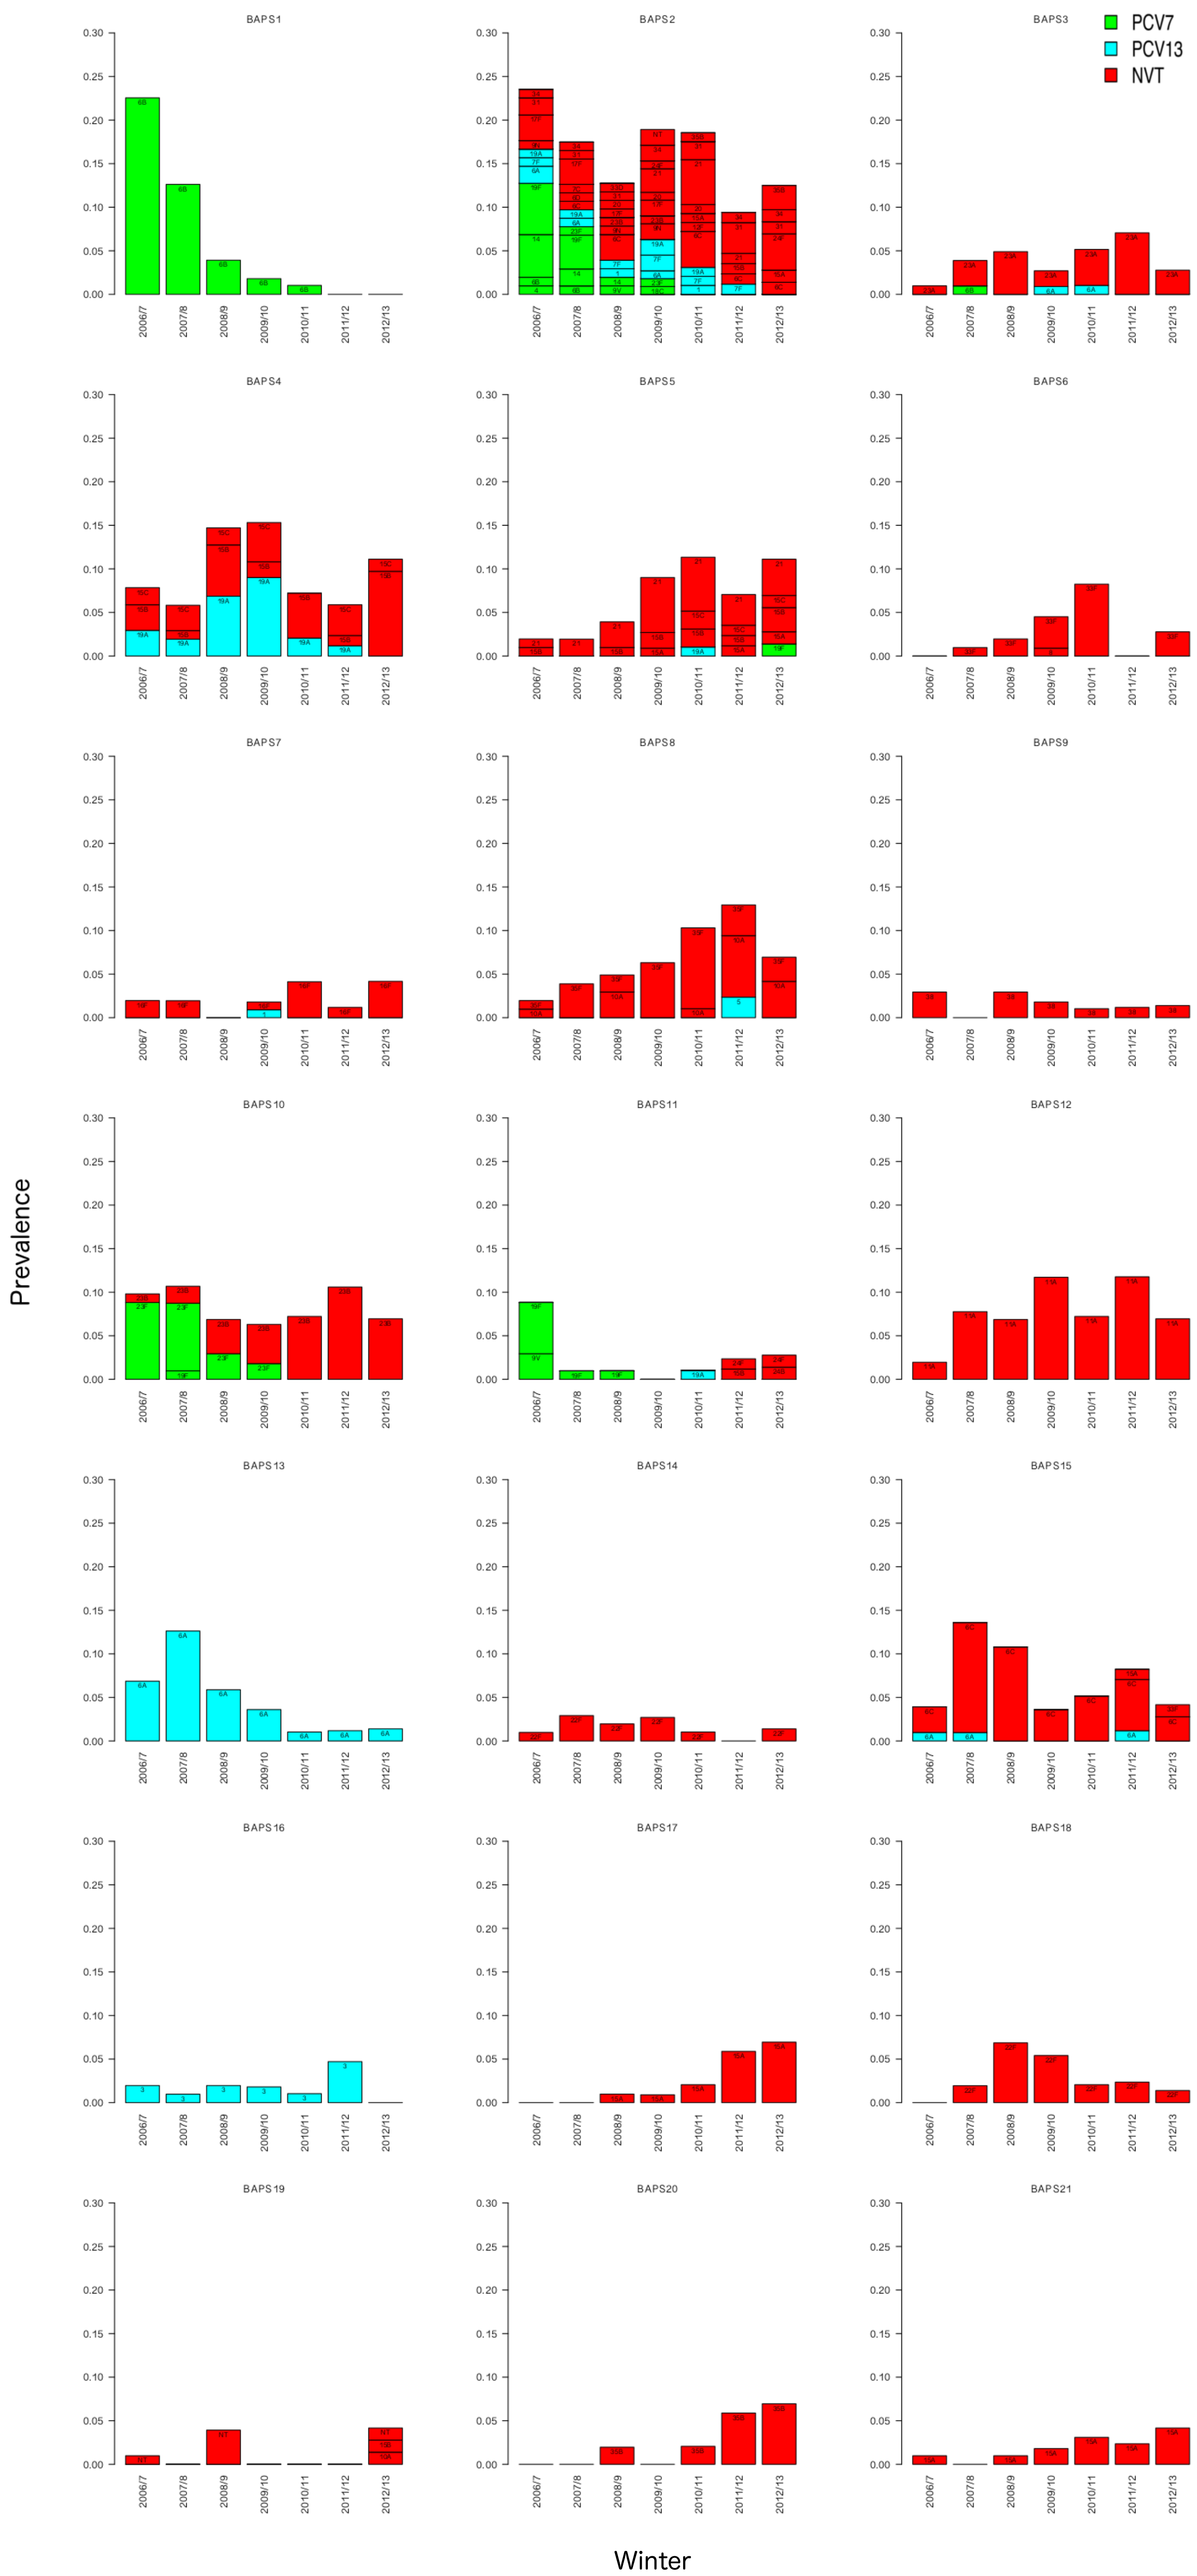

Supplement: mgen-3-119-s002.pdf [file mgen-3-119-s002.pdf]
